# Supplementary material
Source: PubMed Central journal article supplement (PMC9519061)
Supplement: NIHMS1816114-supplement-1.pdf [file NIHMS1816114-supplement-1.pdf]

**Table S1. Descriptive characteristics of the analytic sample over the study period by age cohort\* and gender, UCNets**

| Characteristic                 | Age 21-30 y |             | Age 50-70 y |             |
|--------------------------------|-------------|-------------|-------------|-------------|
|                                | Men         | Women       | Men         | Women       |
|                                | n=117       | n=262       | n=196       | n=365       |
| <b>Network Outcomes</b>        |             |             |             |             |
| Churn, M (SE)                  | 0.51 (0.02) | 0.51 (0.01) | 0.42 (0.01) | 0.41 (0.01) |
| % Kin, M (SE)                  | 0.36 (0.02) | 0.38 (0.02) | 0.43 (0.01) | 0.40 (0.01) |
| Network confidence, M (SE)     | 2.67 (0.05) | 2.71 (0.04) | 2.42 (0.05) | 2.46 (0.04) |
| <b>Life Transitions, n (%)</b> |             |             |             |             |
| School or job transition       | 96 (80.1)   | 227 (82.3)  | —           | —           |
| Became married/partnered       | 40 (32.2)   | 120 (39.9)  | —           | —           |
| Birth of a child               | 11 (15.7)   | 31 (27.3)   | —           | —           |
| Retired                        | —           | —           | 56 (27.6)   | 104 (29.1)  |
| Became divorced/unpartnered    | —           | —           | 12 (6.1)    | 30 (6.6)    |
| Empty nest                     | —           | —           | 9 (3.8)     | 35 (9.2)    |
| <b>Wave 1 Characteristics</b>  |             |             |             |             |
| Age, M (SE)                    | 25.8 (0.4)  | 25.4 (0.3)  | 59.2 (0.5)  | 59.5 (0.4)  |
| Race/Ethnicity, n (%)          |             |             |             |             |
| Non-Hispanic white             | 58 (41.8)   | 134 (36.1)  | 158 (64.8)  | 270 (53.4)  |
| Non-Hispanic black             | 4 (7.4)     | 14 (9.5)    | 9 (7.0)     | 33 (8.8)    |
| Latino                         | 14 (16.9)   | 45 (29.0)   | 11 (10.5)   | 26 (14.9)   |
| Asian                          | 41 (33.9)   | 69 (25.3)   | 18 (17.7)   | 36 (22.9)   |
| Educational Attainment, n (%)  |             |             |             |             |
| Less than bachelor's degree    | 24 (48.0)   | 56 (56.9)   | 54 (51.9)   | 103 (52.4)  |
| Bachelor's degree              | 65 (36.3)   | 143 (28.3)  | 70 (26.2)   | 142 (30.2)  |
| More than bachelor's degree    | 28 (15.7)   | 63 (14.8)   | 72 (21.9)   | 120 (17.4)  |
| Overall Health, n (%)          |             |             |             |             |
| Excellent or very good         | 75 (52.7)   | 168 (53.5)  | 119 (55.6)  | 220 (57.7)  |
| Good                           | 26 (27.2)   | 69 (34.8)   | 46 (26.4)   | 94 (25.6)   |
| Fair or poor                   | 16 (20.1)   | 25 (11.7)   | 31 (18.0)   | 51 (16.7)   |
| Network Size, M (SE)           | 9.4 (0.4)   | 10.7 (0.3)  | 9.6 (0.4)   | 10.6 (0.3)  |

Notes. Group sums may not add to one due to rounding. M (SE), Mean (standard error).

\* Weighted proportions or means (standard error) and unweighted frequencies shown.
